# Supplementary material for: Reduced expression of FILIP1L, a novel WNT pathway inhibitor, is associated with poor survival, progression and chemoresistance in ovarian cancer
Source: PubMed Central journal article supplement (PMC5340232; doi:10.18632/oncotarget.12784), 2016-10-20
Supplement: oncotarget-07-77052-s001.pdf [file oncotarget-07-77052-s001.pdf]

## Reduced expression of FILIP1L, a novel WNT pathway inhibitor, is associated with poor survival, progression and chemoresistance in ovarian cancer

### Supplementary Materials

**Supplementary Table S1: Summary of STR profiles of ovarian cancer cell lines used in this study**

|   |                                               | TH01 | D21S11 | D5S818 | D13S317 | D7S820 | D16S539 | CSFIPO | AMEL | vWA | TPOX |    |    |    |    |   |   |     |    |    |    |  |
|---|-----------------------------------------------|------|--------|--------|---------|--------|---------|--------|------|-----|------|----|----|----|----|---|---|-----|----|----|----|--|
| 1 | GM_GM0777_A05_SKL_ES2_10DIL_024.fsa           | 9.3  | 9.3    | 32.2   | 33.2    | 11     | 13      | 11     | 11   | 11  | 11   | 11 | 13 | 10 | 15 | X | X | 16  | 17 | 8  | 12 |  |
|   | 100% Match to ATCC #CRL-1978                  |      |        |        |         |        |         |        |      |     |      |    |    |    |    |   |   |     |    |    |    |  |
| 2 | GM_GM0777_B05_SKL_OVCA429_10DIL_023.fsa       | 9    | 9      | 30     | 30      | 11     | 12      | 7      | 12   | 11  | 12   | 12 | 12 | 12 | 13 | X | X | 16  | 18 | 9  | 11 |  |
|   | 100% Match to Korch et al. (PMID: 22710073)   |      |        |        |         |        |         |        |      |     |      |    |    |    |    |   |   |     |    |    |    |  |
| 3 | GM_GM0777_C05_SKL_SKOV3_10DIL_022.fsa         | 9    | 9.3    | 30     | 31.2    | 11     | 11      | 8      | 11   | 13  | 14   | 12 | 12 | 11 | 11 | X | X | 18* | 18 | 8  | 11 |  |
|   | 92.86% Match to ATCC #HTB-77                  |      |        |        |         |        |         |        |      |     |      |    |    |    |    |   |   |     |    |    |    |  |
| 4 | GM_GM0777_D05_SKL_HEY_10DIL_018.fsa           | 8    | 9.3    | 30     | 30      | 11     | 12      | 11     | 11   | 12  | 12   | 8  | 12 | 10 | 11 | X | X | 16  | 17 | 11 | 11 |  |
|   | 100% Match to Korch et al. (PMID: 22710073)   |      |        |        |         |        |         |        |      |     |      |    |    |    |    |   |   |     |    |    |    |  |
| 5 | GM_GM0777_E05_SKL_OVCAR8_10DIL_017.fsa        | 7    | 7      | 28     | 28      | 12     | 12      | 12     | 12   | 12  | 12   | 13 | 13 | 11 | 11 | X | X | 17* | 17 | 8  | 8  |  |
|   | 92.86% Match to Korch et al. (PMID: 22710073) |      |        |        |         |        |         |        |      |     |      |    |    |    |    |   |   |     |    |    |    |  |

\*These numbers indicate mismatched alleles.

**Supplementary Table S2: Summary of antibodies and qRT-PCR primers used in this study**

| Antibody                                         | Source            | Application |
|--------------------------------------------------|-------------------|-------------|
| anti-FILIP1L                                     | Aviva             | IHC, IB     |
| glyceraldehyde-3-phosphate dehydrogenase (GAPDH) | Millipore         | IB          |
| E-cadherin                                       | BD Biosciences    | IB, IF      |
| N-cadherin                                       | BD Biosciences    | IB, IF      |
| SNAIL                                            | Novus Biologicals | IHC         |
| SNAIL                                            | Thermo Scientific | IB          |
| $\beta$ -catenin (phospho (Ser33/37/Thr41))      | Cell Signaling    | IB, IF      |
| $\beta$ -catenin (non-phospho)                   | Cell Signaling    | IHC, IB, IF |
| $\beta$ -catenin (total)                         | Cell Signaling    | IB          |
| SLUG                                             | Abcam             | IHC         |
| SLUG                                             | Cell Signaling    | IB          |
| vimentin                                         | Cell Signaling    | IB          |
| lamin B1                                         | Cell Signaling    | IB          |
| $\gamma$ -tubulin                                | Sigma Aldrich     | IF          |
| proteasome 19S-S7 subunit                        | Abcam             | IF          |

IHC: immunohistochemistry, IB: immunoblot, IF: immunofluorescence.

| Gene (official symbol) | Forward primer          | Reverse primer                     |
|------------------------|-------------------------|------------------------------------|
| E-CDH                  | GGAATCCAAGCAGAATTGC     | TATGTGGCAATGCGTTCTCTATCCA          |
| N-CDH                  | CTACAGACATGGAAGGCAATCC  | CACTGATTCTGTACTACTGCGTTC           |
| VIM                    | GGTGGACCAGCTAACCAACGA   | TCAAGGTCAAGACGTGCCAGA              |
| FN1                    | GGGAGCCTCGAAGAGCAAG     | AACCGGGCTTGCTTTGAC                 |
| SNAIL                  | CTTCCAGCAGCCCTACGAC     | CGGTGGGGTTGAGGATCT                 |
| SLUG                   | GAGCATAACAGCCCCATCACT   | AGGAGGTGTCAGATGGAGGA               |
| TWIST1                 | GGAGTCCGCAGTCTTACGAG    | CCAGCTTGAGGGTCTGAATC               |
| ZEB1                   | GCTGCCAATAAGCAAACGAT    | CCATTGGCTGGATCACTTT                |
| MMP2                   | GCTGGCTGCCTTAGAACCTTTC  | GAACCATCACTATGTGGGCTGAGA           |
| MMP3                   | GAAGAGAAATCCATGGAGCCAGG | AGAAATAAAAGAACCCAAATTCTTCAAAAACA   |
| MMP7                   | GGGACATTCTCTGATCCTAATGC | GAATTACTTCTCTTTCCATATAGTTTCTGAATGC |
| GAPDH                  | TGCACCACCAACTGCTTAG     | AGAGGCAGGGATGATGTTC                |

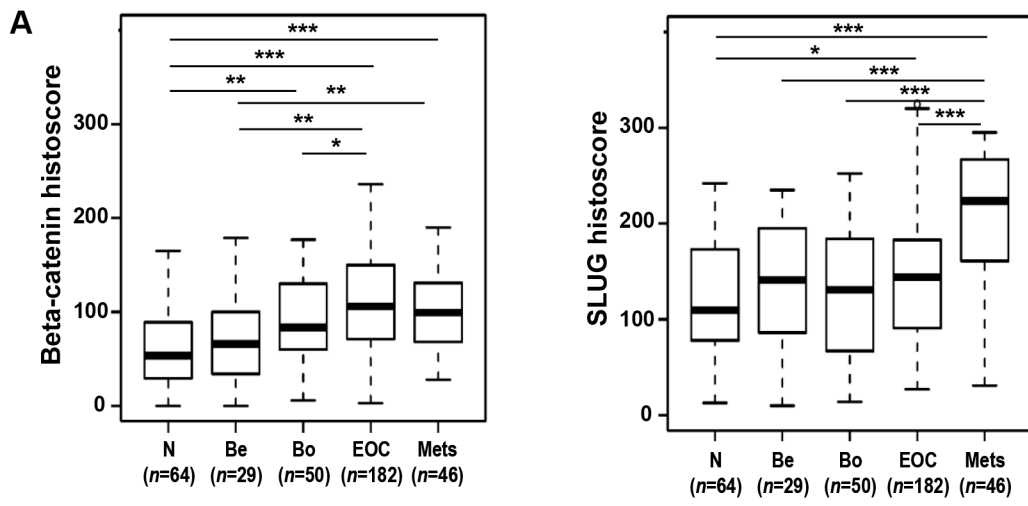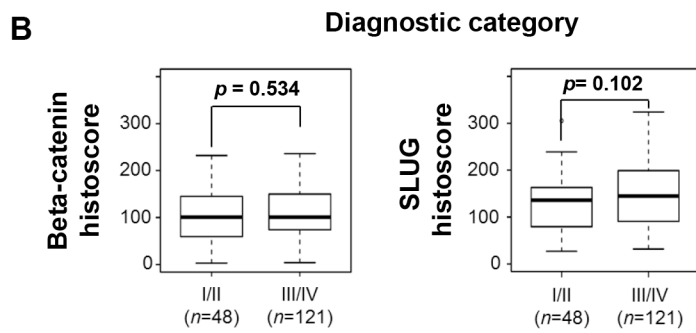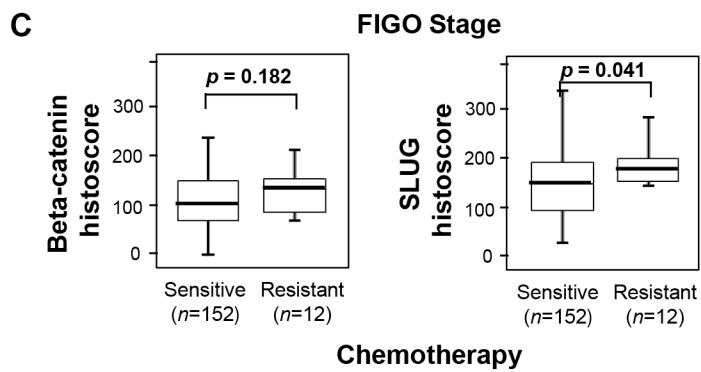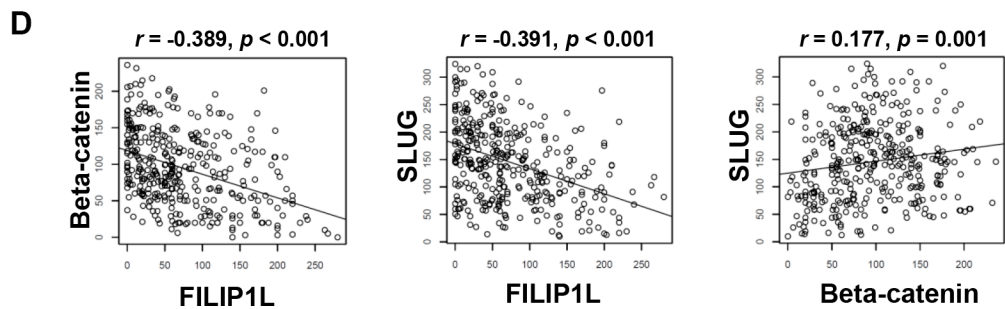

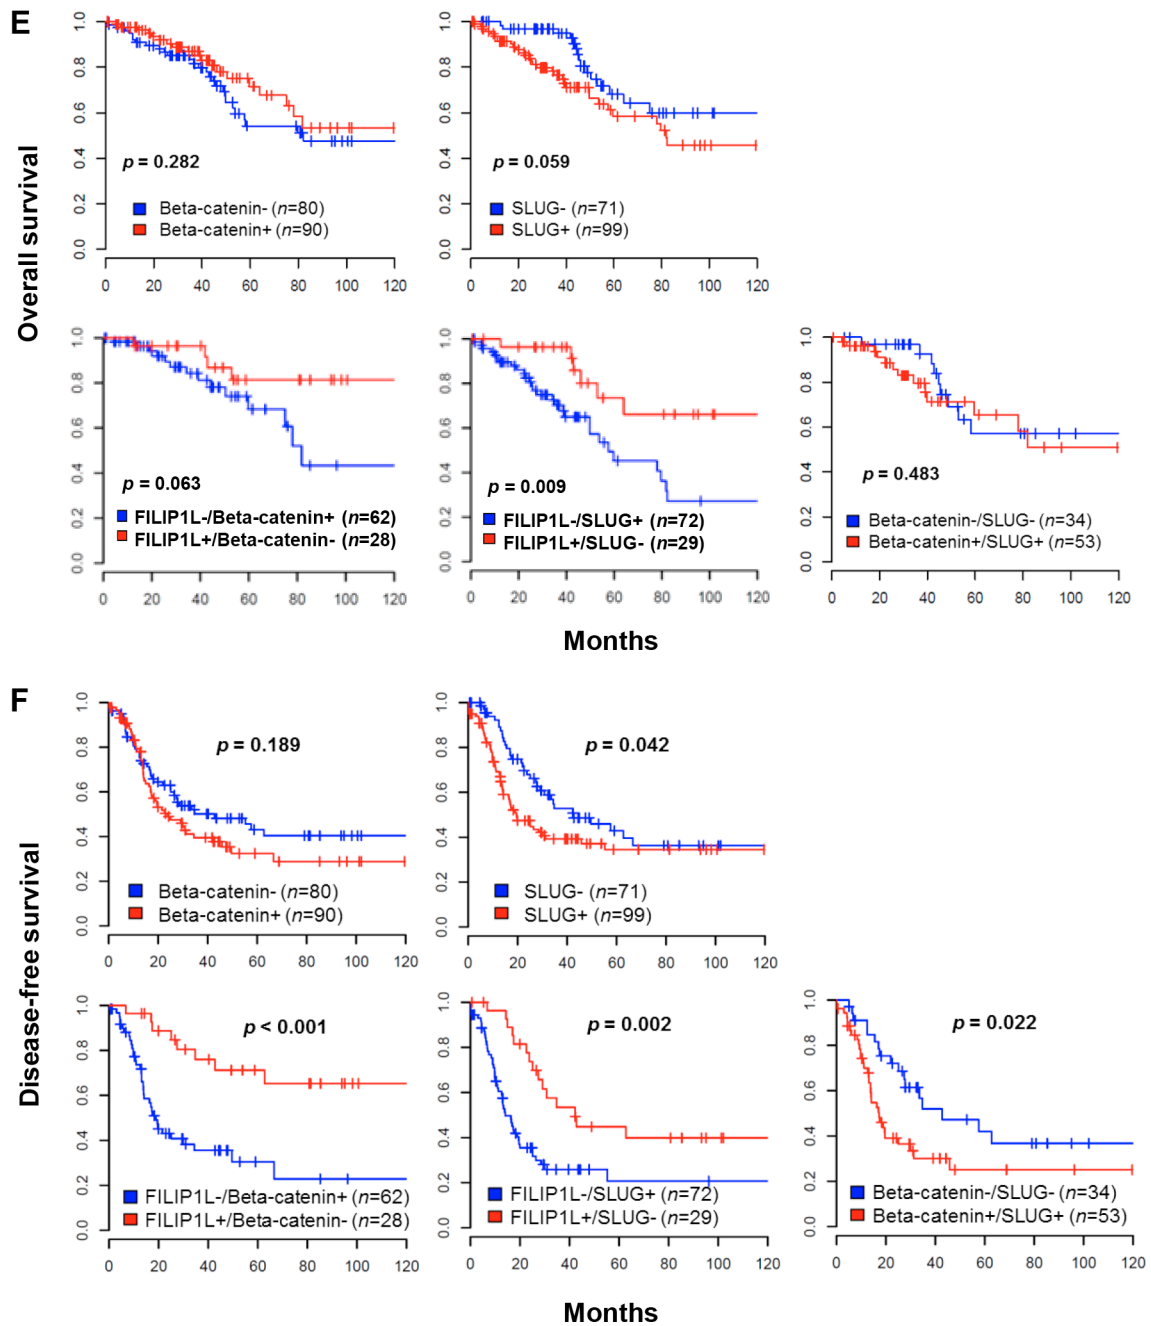

**Supplementary Figure S1: Expression of FILIP1L,  $\beta$ -catenin and SLUG in normal and cancerous ovarian tissue.**

(A) Expression of  $\beta$ -catenin and SLUG was analyzed in specimens from normal ( $n = 64$ ), benign ( $n = 29$ ), borderline ( $n = 50$ ), epithelial ovarian cancer ( $n = 123$  for Serous type;  $n = 59$  for other histologies) and metastasis ( $n = 46$ ). \*, \*\* and \*\*\* indicate  $P < 0.05$ ,  $P < 0.01$  and  $P < 0.001$ , respectively. B-C. Expression of  $\beta$ -catenin and SLUG was compared between specimens from FIGO stage I/II and stage III/IV ovarian cancers (B) as well as between specimens from chemo-sensitive and chemoresistant ovarian cancer patients (C). (D) Correlation between indicated protein expression in ovarian tissues was analyzed. (E–F) Overall survival (E) and Disease-free survival (F) of ovarian cancer patients according to the expression of FILIP1L,  $\beta$ -catenin, SLUG and their combination was analyzed in Kaplan–Meier plots. Histscore of  $\geq 75$ ,  $\geq 100$  or  $\geq 125$  for FILIP1L,  $\beta$ -catenin or SLUG expression, respectively was considered positive.

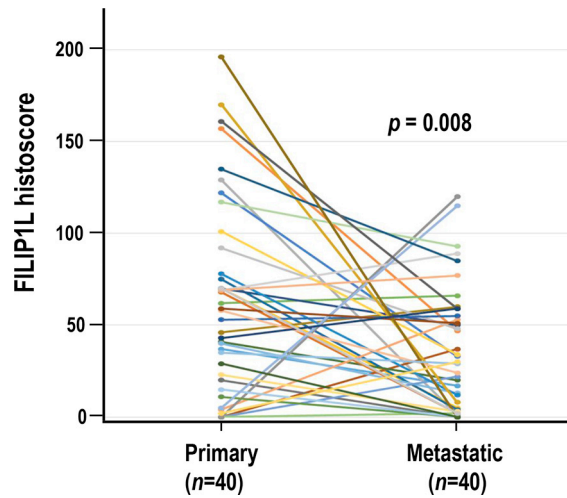

**Supplementary Figure S2: Parallel coordinate plot analysis of FILIP1L expression in primary epithelial ovarian cancers and their matched metastatic tissues.** *P* value was obtained from paired sample tests.

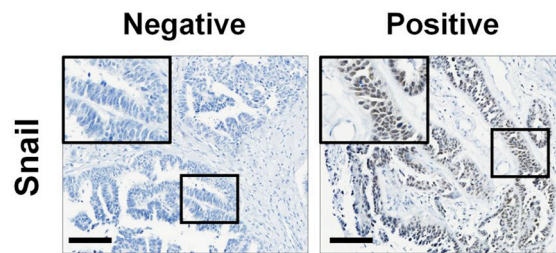

**Supplementary Figure S3: Immunohistochemical staining of SNAIL in ovarian tissues.** Representative images of human ovarian cancers with negative and positive SNAIL expression are shown. High magnification images are shown in inset. Scale bar shown is 100  $\mu$ m.

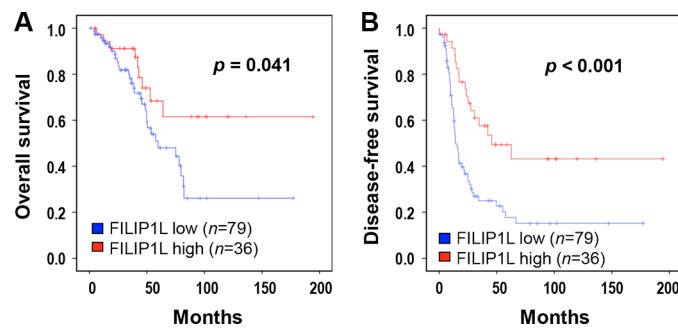

**Supplementary Figure S4: Overall survival (A) and disease-free survival (B) of serous ovarian cancer patients based on FILIP1L expression was analyzed in Kaplan–Meier plots.** Histoscore of  $\geq 75$  for FILIP1L expression was considered high.

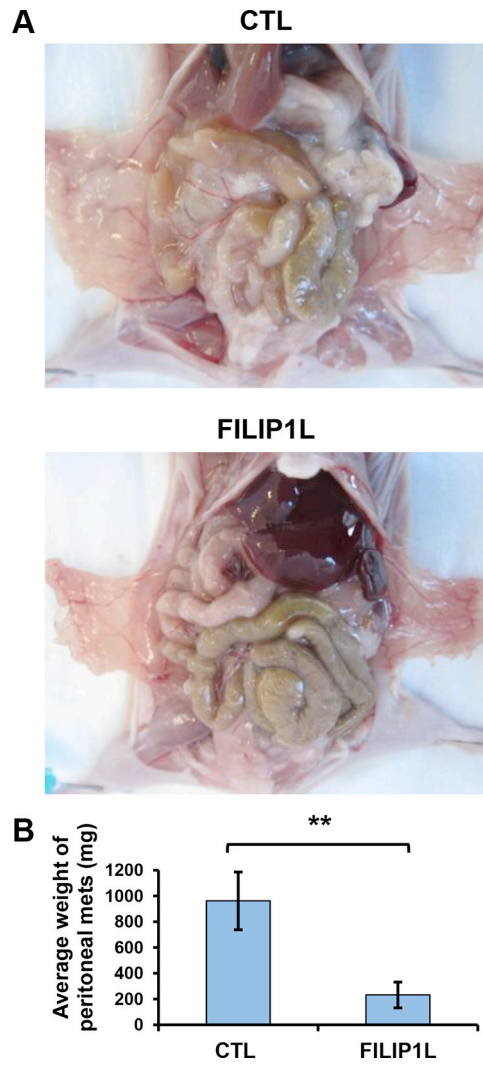

**Supplementary Figure S5: The effect of FILIP1L expression on the metastatic potential of ES2 cells in a mouse model.** Peritoneal metastasis from ES2 cells was examined at day 19 after orthotopic injection. Representative peritoneal images (**A**) and quantified metastatic tumor growth (**B**) are shown. The y axis represents the average metastatic tumor weight (8 mice per group). \*\* indicates  $P < 0.01$ .

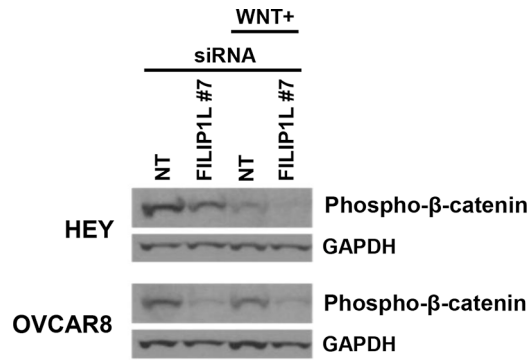

**Supplementary Figure S6: FILIP1L knockdown reduces inactive β-catenin pool.** FILIP1L-high expressing HEY and OVCAR8 cells were treated with indicated siRNA for 2 days, and with solvent or 40 mM LiCl (WNT+) for an additional day. Cell lysates were immunoblotted with antibodies against inactive phospho-β-catenin. GAPDH blot is shown as the loading control. The result is representative of two independent experiments.

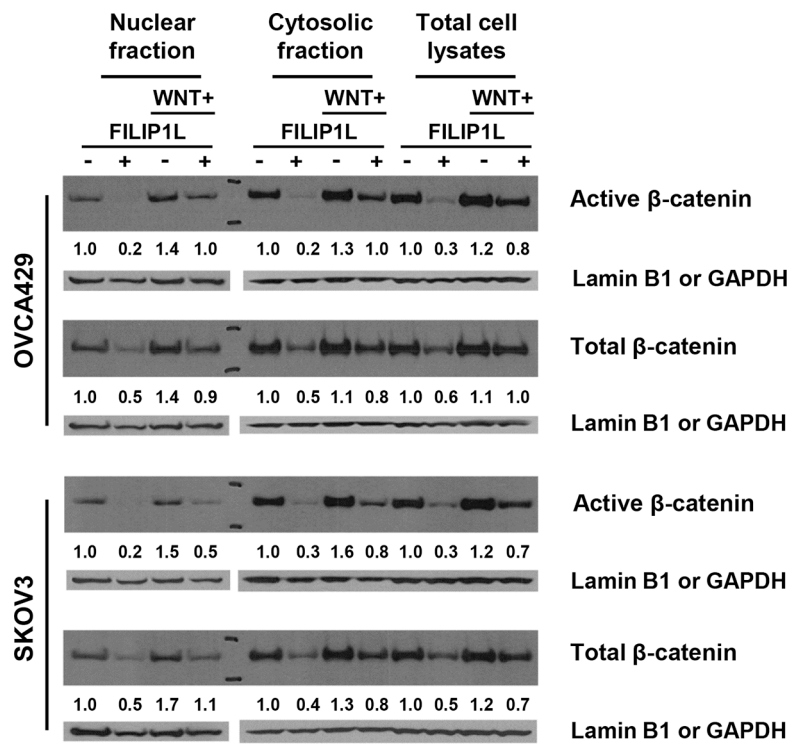

**Supplementary Figure S7: FILIP1L reduces active β-catenin in the nucleus and cytosol.** Parental and FILIP1L+ OVCA429 and SKOV3 clones were treated with solvent or 40 mM LiCl for 24 h (WNT+). Nuclear, cytosolic and total cell lysates were immunoblotted with antibodies against active non-phospho-β-catenin and total β-catenin. Lamin B1 (for nuclear) and GAPDH (for cytosolic and total) blot is shown as the loading control for cell lysates. Values indicate the quantified β-catenin amount normalized to the respective loading control, lamin B1 or GAPDH. The result is representative of three independent experiments.

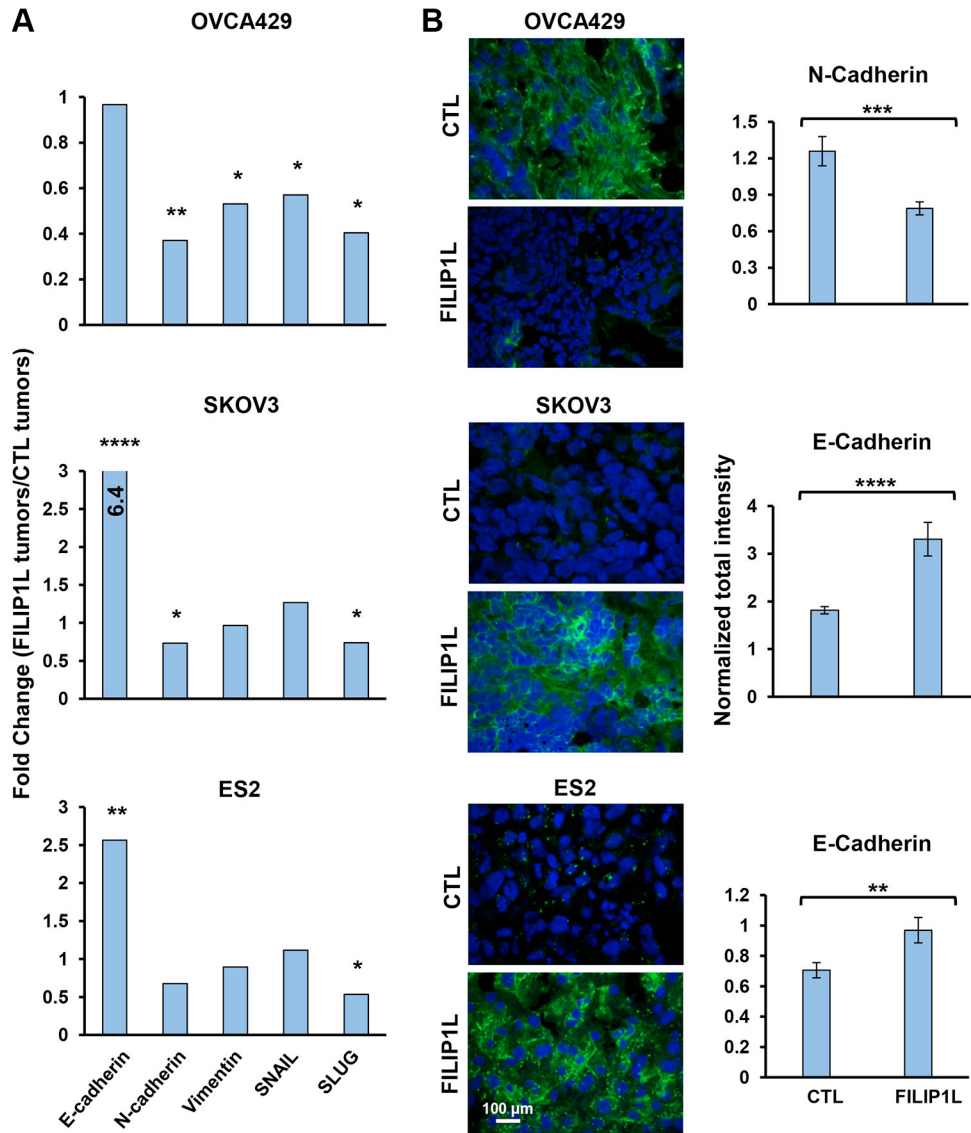

**Supplementary Figure S8: FILIP1L inhibits expression of EMT markers in mouse primary tumors.** (A) qRT-PCR analysis for EMT markers conducted on cDNA from FILIP1L clone-derived tumors. The y axis represents fold change of FILIP1L+ tumors ( $n = 6$ ) over control tumors ( $n = 6$ ), where each value was standardized with the housekeeping gene GAPDH. (B) Immunofluorescent staining of E-cadherin or N-cadherin (green) in FILIP1L clone-derived tumors. Nuclei counterstained with DAPI (blue). A merged image is shown. Shown at right is the quantified data from four random fields per tumor ( $n = 24$ ). \*, \*\*, \*\*\* and \*\*\*\* indicate  $P < 0.05$ ,  $P < 0.01$ ,  $P < 0.001$  and  $P < 0.0001$ , respectively.
